# Supplementary material for: Thermodynamic properties, crystal structure and phase relations of pushcharovskite [Cu(AsO&lt;sub&gt;3&lt;/sub&gt;OH)(H&lt;sub&gt;2&lt;/sub&gt;O) ⋅ 0.5H&lt;sub&gt;2&lt;/sub&gt;O], geminite [Cu(AsO&lt;sub&gt;3&lt;/sub&gt;OH)(H&lt;sub&gt;2&lt;/sub&gt;O)] and liroconite [Cu&lt;sub&gt;2&lt;/sub&gt;Al(AsO&lt;sub&gt;4&lt;/sub&gt;)(OH)&lt;sub&gt;4&lt;/sub&gt; ⋅ 4H&lt;sub&gt;2&lt;/sub&gt;O]
Source: Copernicus journal article supplement (doi:10.5194/ejm-32-285-2020), 2020-05-11
Supplement: Supplementary file 1 [file ejm-32-285-2020-supplement.zip]

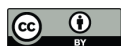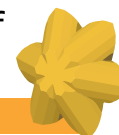

*Supplement of*

**Thermodynamic properties, crystal structure and phase relations of  
pushcharovskite  $[\text{Cu}(\text{AsO}_3\text{OH})(\text{H}_2\text{O}) \cdot 0.5\text{H}_2\text{O}]$ , geminite  
 $[\text{Cu}(\text{AsO}_3\text{OH})(\text{H}_2\text{O})]$  and liroconite  $[\text{Cu}_2\text{Al}(\text{AsO}_4)(\text{OH})_4 \cdot 4\text{H}_2\text{O}]$**

**Alexandra M. Plumhoff et al.**

*Correspondence to:* Alexandra M. Plumhoff ([alexandra.m.plumhoff@gmail.com](mailto:alexandra.m.plumhoff@gmail.com))

- [ejm-32-285-2020-supplement-title-page.pdf](#)
- [liroconite\\_final.cif](#)

The copyright of individual parts of the supplement might differ from the CC BY 4.0 License.
